# Supplementary material for: Prevalence, Awareness, and Treatment of Isolated Diastolic Hypertension: Insights From the China PEACE Million Persons Project
Source: PubMed Central journal article supplement — J Am Heart Assoc. 2019 Sep 28;8(19):e012954. doi: 10.1161/JAHA.119.012954 (PMC6806046; doi:10.1161/jaha.119.012954), 2019-09-28

# **SUPPLEMENTAL MATERIAL**

## Data S1.

### Supplemental Methods

Equation for the generalized linear mixed effects multivariable regression models used to study the association between individual characteristics and the prevalence of isolated diastolic hypertension and the awareness among untreated participants with isolated diastolic hypertension.

If  $Y_{ij}$  indicates that the  $i^{\text{th}}$  patient in the  $j^{\text{th}}$  township is hypertensive, then we estimated

$$\text{logit}(\text{Pr}[Y_{ij}=1]) = \alpha_j + \Sigma BX_{ij}$$

where  $\alpha_j \sim N(0, \tau^2)$  is a random intercept over townships and  $X_{ij}$  is a vector of patient risk factors.

We used age, sex, marital status, annual household income, education level, occupation, health insurance status, smoking, alcohol use, obesity, diabetes mellitus, prior cardiovascular events, and geographical region as risk factors.

**Table S1. Baseline characteristics of participants with isolated diastolic hypertension, by treatment status.**

| <b>Characteristics, n (%), 95% CI)</b> | <b>Untreated participants with IDH</b> | <b>Treated participants with IDH</b> |
|----------------------------------------|----------------------------------------|--------------------------------------|
| <b>N (%)</b>                           | 63112                                  | 10167                                |
| <b>Age (years)</b>                     |                                        |                                      |
| 35-39                                  | 4361 (6.9%, 6.7 - 7.1)                 | 242 (2.4%, 2.1 - 2.7)                |
| 40-44                                  | 9658 (15.3%, 15.0 - 15.6)              | 880 (8.7%, 8.1 - 9.2)                |
| 45-49                                  | 13,560 (21.5%, 21.2 - 21.8)            | 1768 (17.4%, 16.7 - 18.1)            |
| 50-54                                  | 13,939 (22.1%, 21.8 - 22.4)            | 2540 (25.0%, 24.1 - 25.8)            |
| 55-59                                  | 8354 (13.2%, 13.0 - 13.5)              | 1728 (17.0%, 16.3 - 17.7)            |
| 60-64                                  | 7258 (11.5%, 11.3 - 11.7)              | 1652 (16.2%, 15.5 - 17.0)            |
| 65-69                                  | 4062 (6.4%, 6.2 - 6.6)                 | 923 (9.1%, 8.5 - 9.6)                |
| 70-75                                  | 1920 (3.0%, 2.9 - 3.2)                 | 434 (4.3%, 3.9 - 4.7)                |
| <b>Sex</b>                             |                                        |                                      |
| Men                                    | 36,421 (57.7%, 57.3 - 58.1)            | 5939 (58.4%, 57.5 - 59.4)            |
| Women                                  | 26,691 (42.3%, 41.9 - 42.7)            | 4228 (41.6%, 40.6 - 42.5)            |
| <b>Urbanity</b>                        |                                        |                                      |
| Urban                                  | 22,345 (35.4%, 35.0 - 35.8)            | 3964 (39.0%, 38.0 - 39.9)            |
| Rural                                  | 40,767 (64.6%, 64.2 - 65.0)            | 6203 (61.0%, 60.1 - 62.0)            |
| <b>Region</b>                          |                                        |                                      |
| Eastern                                | 20,374 (32.3%, 31.9 - 32.6)            | 3528 (34.7%, 33.8 - 35.6)            |
| Western                                | 24,697 (39.1%, 38.8 - 39.5)            | 3459 (34.0%, 33.1 - 34.9)            |
| Central                                | 18,041 (28.6%, 28.2 - 28.9)            | 3180 (31.3%, 30.4 - 32.2)            |
| <b>Education</b>                       |                                        |                                      |
| Primary school or lower                | 23,063 (36.5%, 36.2 - 36.9)            | 3149 (31.0%, 30.1 - 31.9)            |
| Middle school                          | 22,377 (35.5%, 35.1 - 35.8)            | 3582 (35.2%, 34.3 - 36.2)            |
| High school                            | 10,333 (16.4%, 16.1 - 16.7)            | 2035 (20.0%, 19.2 - 20.8)            |
| College or above                       | 6314 (10.0%, 9.8 - 10.2)               | 1288 (12.7%, 12.0 - 13.3)            |
| Unknown*                               | 1025 (1.6%, 1.5 - 1.7)                 | 113 (1.1%, 0.9 - 1.3)                |
| <b>Employment</b>                      |                                        |                                      |
| Employed                               | 50,534 (80.1%, 79.8 - 80.4)            | 7048 (69.3%, 68.4 - 70.2)            |
| Unemployed                             | 1109 (1.8%, 1.7 - 1.9)                 | 236 (2.3%, 2.0 - 2.6)                |
| Retired                                | 6351 (10.1%, 9.8 - 10.3)               | 1991 (19.6%, 18.8 - 20.4)            |
| Housework                              | 3761 (6.0%, 5.8 - 6.1)                 | 709 (7.0%, 6.5 - 7.5)                |
| Unknown*                               | 1357 (2.2%, 2.0 - 2.3)                 | 183 (1.8%, 1.5 - 2.1)                |
| <b>Occupation</b>                      |                                        |                                      |
| Famer                                  | 30,616 (48.5%, 48.1 - 48.9)            | 3946 (38.8%, 37.9 - 39.8)            |
| Nonfarmer                              | 31,139 (49.3%, 48.9 - 49.7)            | 6038 (59.4%, 58.4 - 60.3)            |

|                                      |                             |                           |
|--------------------------------------|-----------------------------|---------------------------|
| Unknown*                             | 1357 (2.2%, 2.0 - 2.3)      | 183 (1.8%, 1.5 - 2.1)     |
| <b>Household Income (Yuan/year)</b>  |                             |                           |
| < 10,000                             | 12,725 (20.2%, 19.8 - 20.5) | 1582 (15.6%, 14.9 - 16.3) |
| 10,000-50,000                        | 34,601 (54.8%, 54.4 - 55.2) | 5758 (56.6%, 55.7 - 57.6) |
| > 50,000                             | 9903 (15.7%, 15.4 - 16.0)   | 2005 (19.7%, 18.9 - 20.5) |
| Unknown*                             | 5883 (9.3%, 9.1 - 9.5)      | 822 (8.1%, 7.6 - 8.6)     |
| <b>Marital Status</b>                |                             |                           |
| Married                              | 59,671 (94.5%, 94.4 - 94.7) | 9488 (93.3%, 92.8 - 93.8) |
| Widowed, separated, divorced, single | 2629 (4.2%, 4.0 - 4.3)      | 563 (5.5%, 5.1 - 6.0)     |
| Unknown*                             | 812 (1.3%, 1.2 - 1.4)       | 116 (1.1%, 0.9 - 1.3)     |
| <b>Health Insurance Status</b>       |                             |                           |
| Insured                              | 61,637 (97.7%, 97.5 - 97.8) | 9943 (97.8%, 97.5 - 98.1) |
| Uninsured                            | 448 (0.7%, 0.6 - 0.8)       | 54 (0.5%, 0.4 - 0.7)      |
| Unknown*                             | 1027 (1.6%, 1.5 - 1.7)      | 170 (1.7%, 1.4 - 1.9)     |
| <b>Medical History</b>               |                             |                           |
| Myocardial Infarction                | 334 (0.5%, 0.5 - 0.6)       | 162 (1.6%, 1.3 - 1.8)     |
| Stroke                               | 986 (1.6%, 1.5 - 1.7)       | 628 (6.2%, 5.7 - 6.6)     |
| Diabetes Mellitus                    | 2521 (4.0%, 3.8 - 4.1)      | 978 (9.6%, 9.0 - 10.2)    |
| <b>CVD Risk Factor</b>               |                             |                           |
| Current smoker                       | 17,842 (28.3%, 27.9 - 28.6) | 2825 (27.8%, 26.9 - 28.7) |
| Current drinker                      | 22,740 (36.0%, 35.7 - 36.4) | 3789 (37.3%, 36.3 - 38.2) |
| Obesity                              | 13,970 (22.1%, 21.8 - 22.5) | 3271 (32.2%, 31.3 - 33.1) |

CI, Confidence Interval; CVD, Cardiovascular Disease; IDH, Isolated Diastolic Hypertension

\* Participants either refused to answer the question or did not know the answer.

**Table S2. Prevalence of isolated diastolic hypertension among treated hypertensive participants, by population characteristics.**

| <b>Characteristics, n (%), 95% CI)</b> | <b>Treated Hypertensives</b> | <b>Prevalence of IDH</b> |
|----------------------------------------|------------------------------|--------------------------|
| <b>N (%)</b>                           | 305,114                      | 10,167 (3.3%, 3.3 - 3.4) |
| <b>Age (years)</b>                     |                              |                          |
| 35-39                                  | 2234                         | 242 (10.8%, 9.5 - 12.1)  |
| 40-44                                  | 8621                         | 880 (10.2%, 9.6 - 10.8)  |
| 45-49                                  | 22,341                       | 1768 (7.9%, 7.6 - 8.3)   |
| 50-54                                  | 44,989                       | 2540 (5.6%, 5.4 - 5.9)   |
| 55-59                                  | 48,750                       | 1728 (3.5%, 3.4 - 3.7)   |
| 60-64                                  | 70,373                       | 1652 (2.3%, 2.2 - 2.5)   |
| 65-69                                  | 63,575                       | 923 (1.5%, 1.4 - 1.5)    |
| 70-75                                  | 44,231                       | 434 (1.0%, 0.9 - 1.1)    |
| <b>Sex</b>                             |                              |                          |
| Men                                    | 122,604                      | 5939 (4.8%, 4.7 - 5.0)   |
| Women                                  | 182,510                      | 4228 (2.3%, 2.2 - 2.4)   |
| <b>Urbanity</b>                        |                              |                          |
| Urban                                  | 121,796                      | 3964 (3.3%, 3.2 - 3.4)   |
| Rural                                  | 183,318                      | 6203 (3.4%, 3.3 - 3.5)   |
| <b>Region</b>                          |                              |                          |
| Eastern                                | 117,526                      | 3528 (3.0%, 2.9 - 3.1)   |
| Western                                | 96,020                       | 3459 (3.6%, 3.5 - 3.7)   |
| Central                                | 91,568                       | 3180 (3.5%, 3.4 - 3.6)   |
| <b>Education</b>                       |                              |                          |
| Primary school or lower                | 141,784                      | 3149 (2.2%, 2.1 - 2.3)   |
| Middle school                          | 94,633                       | 3582 (3.8%, 3.7 - 3.9)   |
| High school                            | 46,285                       | 2035 (4.4%, 4.2 - 4.6)   |
| College or above                       | 19,279                       | 1288 (6.7%, 6.3 - 7.0)   |
| Unknown*                               | 3133                         | 113 (3.6%, 3.0 - 4.3)    |
| <b>Employment</b>                      |                              |                          |
| Employed                               | 184,078                      | 7048 (3.8%, 3.7 - 3.9)   |
| Unemployed                             | 4236                         | 236 (5.6%, 4.9 - 6.3)    |
| Retired                                | 83,825                       | 1991 (2.4%, 2.3 - 2.5)   |
| Housework                              | 28,919                       | 709 (2.5%, 2.3 - 2.6)    |
| Unknown*                               | 4056                         | 183 (4.5%, 3.9 - 5.2)    |
| <b>Occupation</b>                      |                              |                          |
| Famer                                  | 139,046                      | 3946 (2.8%, 2.8 - 2.9)   |
| Nonfarmer                              | 162,012                      | 6038 (3.7%, 3.6 - 3.8)   |
| Unknown*                               | 4056                         | 183 (4.5%, 3.9 - 5.2)    |

|                                      |         |                        |
|--------------------------------------|---------|------------------------|
| <b>Household Income (Yuan/year)</b>  |         |                        |
| < 10,000                             | 62,445  | 1582 (2.5%, 2.4 - 2.7) |
| 10,000-50,000                        | 171,760 | 5758 (3.4%, 3.3 - 3.4) |
| > 50,000                             | 48,107  | 2005 (4.2%, 4.0 - 4.3) |
| Unknown*                             | 22,802  | 822 (3.6%, 3.4 - 3.8)  |
| <b>Marital Status</b>                |         |                        |
| Married                              | 276,287 | 9488 (3.4%, 3.4 - 3.5) |
| Widowed, separated, divorced, single | 25,708  | 563 (2.2%, 2.0 - 2.4)  |
| Unknown*                             | 3119    | 116 (3.7%, 3.1 - 4.4)  |
| <b>Health Insurance Status</b>       |         |                        |
| Insured                              | 299,640 | 9943 (3.3%, 3.3 - 3.4) |
| Uninsured                            | 1262    | 54 (4.3%, 3.2 - 5.4)   |
| Unknown*                             | 4212    | 170 (4.0%, 3.4 - 4.6)  |
| <b>Medical History</b>               |         |                        |
| Myocardial Infarction                | 5776    | 162 (2.8%, 2.4 - 3.2)  |
| Stroke                               | 21,343  | 628 (2.9%, 2.7 - 3.2)  |
| Diabetes Mellitus                    | 45,532  | 978 (2.1%, 2.0 - 2.3)  |
| <b>CVD Risk Factor</b>               |         |                        |
| Current smoker                       | 56,473  | 2825 (5.0%, 4.8 - 5.2) |
| Current drinker                      | 72,935  | 3789 (5.2%, 5.0 - 5.4) |
| Obesity                              | 84,843  | 3271 (3.9%, 3.7 - 4.0) |

CI, Confidence Interval; CVD, Cardiovascular Disease; IDH, Isolated Diastolic Hypertension

\* Participants either refused to answer the question or did not know the answer.

**Figure S1. Flowchart of study participant selection in China Patient-Centered Evaluative Assessment of Cardiac Events Million Persons Project.**

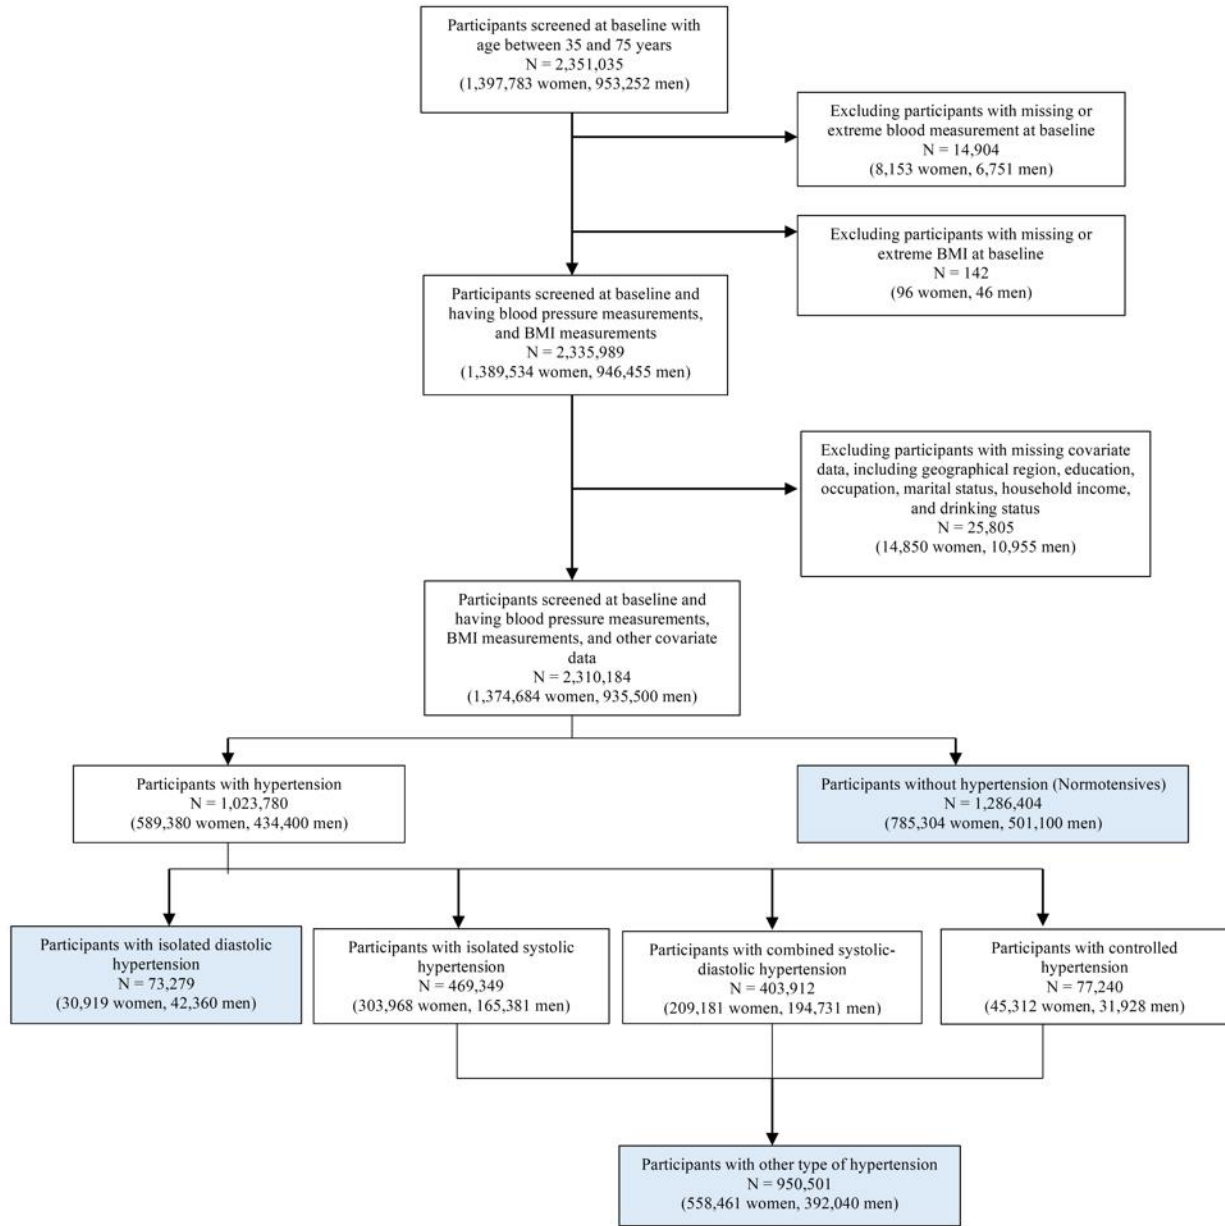

BMI, Body Mass Index

**Figure S2. Histograms of prevalence of isolated diastolic hypertension (IDH) and awareness among untreated IDH participants in 1,198 mutually exclusive population subgroups (at least 200 participants each) defined priori by 10 selected characteristics.**

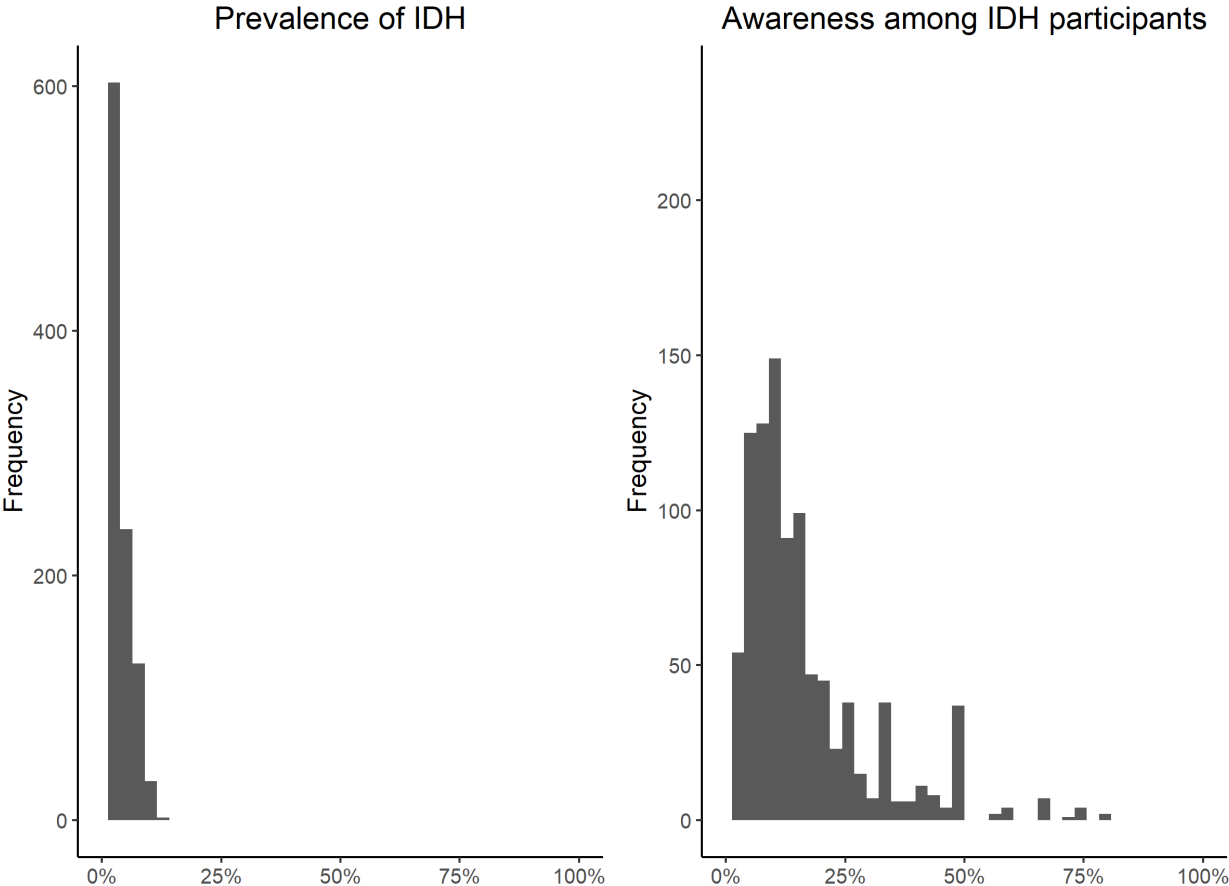



**Figure S3. Histograms prevalence of isolated diastolic hypertension (IDH) and awareness among untreated IDH participants in 731 mutually exclusive population subgroups (at least 500 participants each) defined priori by 10 selected characteristics.**

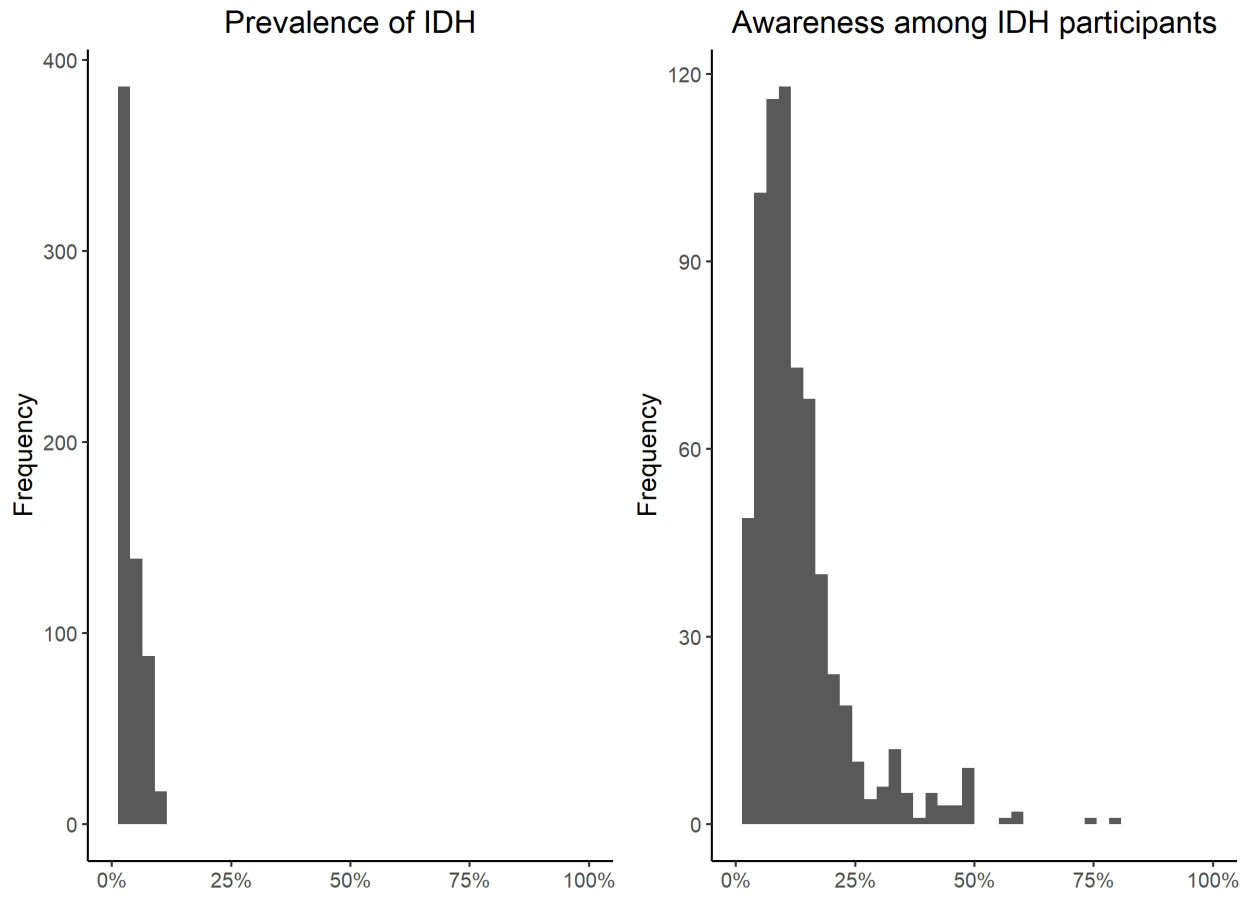

**Figure S4. Density plots of prevalence of isolated diastolic hypertension (IDH) among all study participants (A) and awareness among untreated IDH participants (B) in 731 mutually exclusive population subgroups (of at least 500 participants), by age, sex, prior cardiovascular events, history of diabetes and urbanity.**

**A. Prevalence**

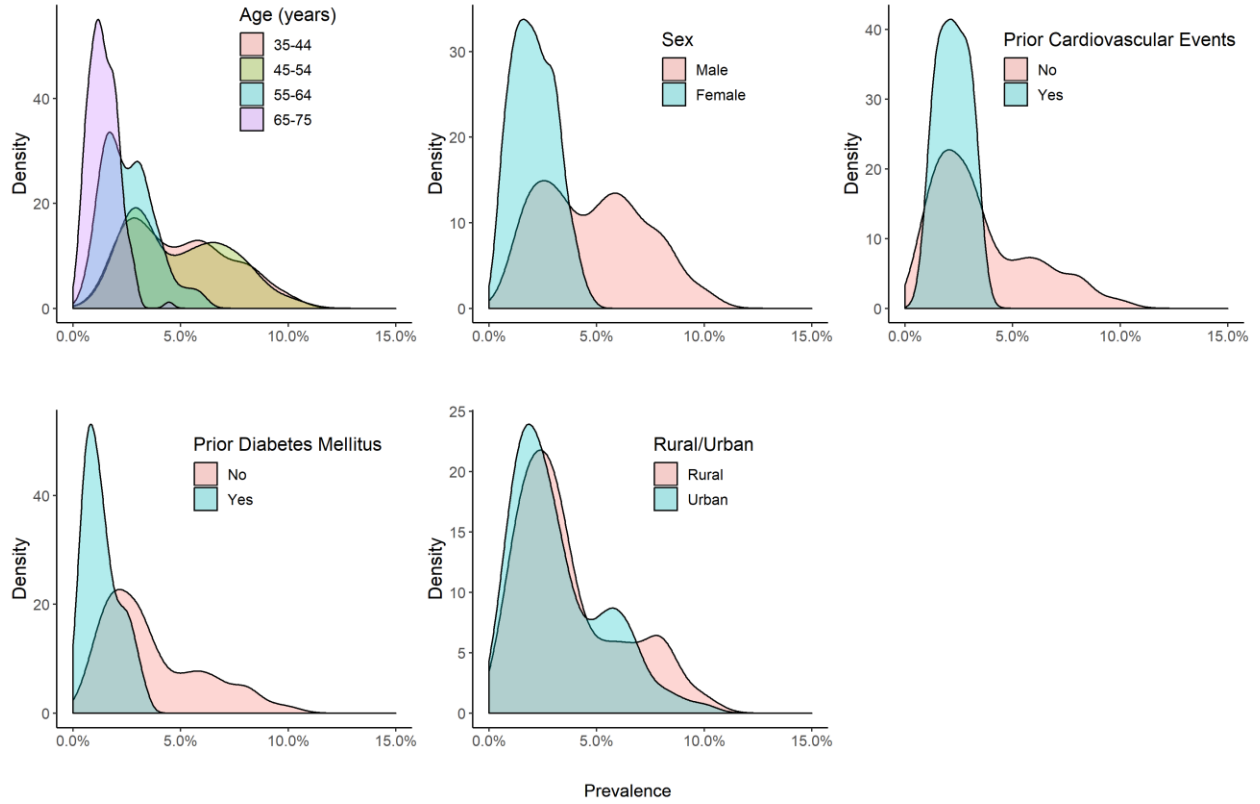

**B. Awareness**

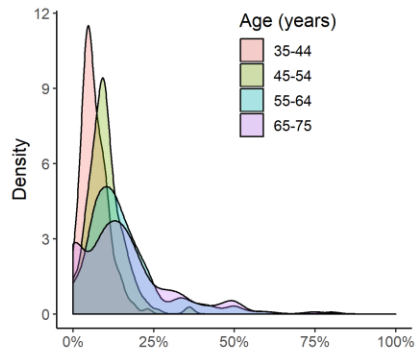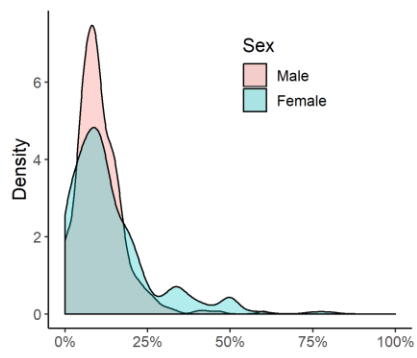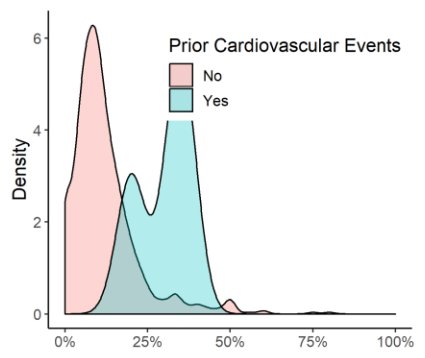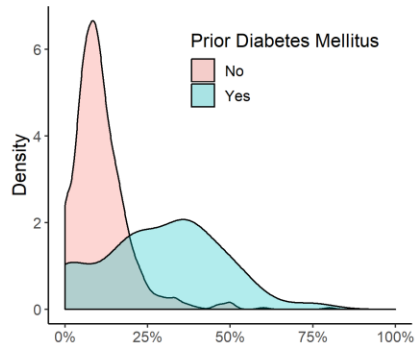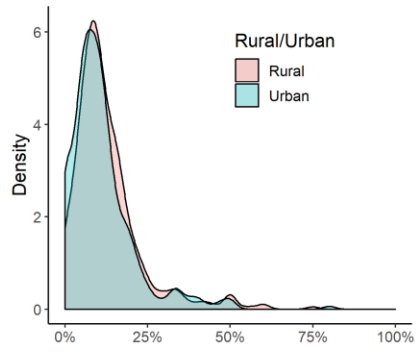

Awareness

**Figure S5. Number of antihypertensive medications used by treated participants with isolated diastolic hypertension, by degree of diastolic blood pressure (DBP) elevation.**

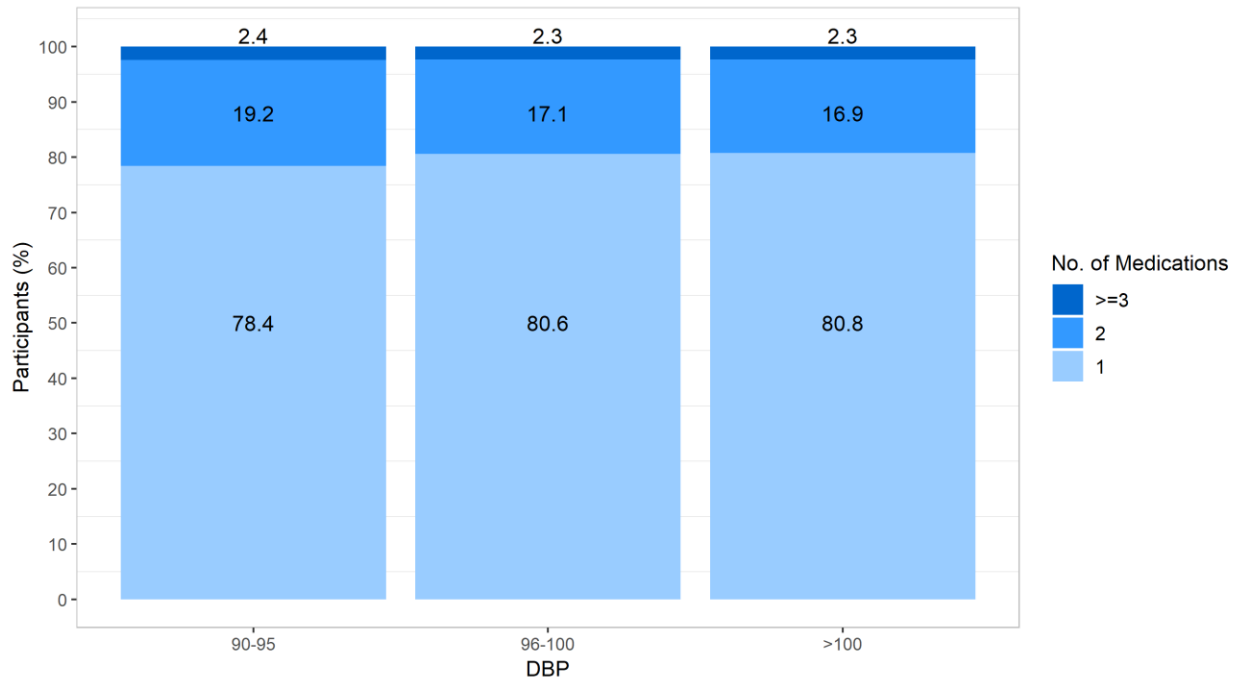

Supplement: JAH3-8-e012954-s001.pdf [file JAH3-8-e012954-s001.pdf]
